# Supplementary material for: Ship- and aircraft-based XCH 4 over oceans as a new tool for satellite validation
Source: Copernicus journal article supplement (doi:10.5194/amt-17-1297-2024), 2024-02-23
Supplement: Supplementary file 1 [file amt-17-1297-2024-supplement.pdf]

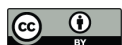

*Supplement of*

## **Ship- and aircraft-based XCH<sub>4</sub> over oceans as a new tool for satellite validation**

**Astrid Müller et al.**

*Correspondence to:* Astrid Müller ([mueller.astrid@nies.go.jp](mailto:mueller.astrid@nies.go.jp)) and Hiroshi Tanimoto ([tanimoto@nies.go.jp](mailto:tanimoto@nies.go.jp))

The copyright of individual parts of the supplement might differ from the article licence.

**Table S1.** The monthly averaged (Avg.) values and the standard deviation (SD.) of the ship (TF5 + RYF) and aircraft (CONTRAIL, JMA) CH<sub>4</sub> retrievals for the latitude range 30–40° N, 2014–2018.

| Date<br>(MM/YY) | Avg. Ship<br>(ppb) | SD    | Avg.<br>CONTRAIL<br>(ppb) | SD    | Avg. JMA<br>(ppb) | SD    |
|-----------------|--------------------|-------|---------------------------|-------|-------------------|-------|
| 01/14           | 1911.88            | 22.32 | 1849.78                   | –     | 1864.27           | 12.77 |
| 02/14           | 1912.87            | 20.97 | 1819.17                   | 4.82  | 1863.00           | 4.77  |
| 03/14           | 1912.29            | 22.70 | 1823.12                   | 35.43 | 1848.41           | 1.70  |
| 04/14           | 1894.78            | 17.63 | 1830.18                   | 9.54  | 1901.39           | 9.06  |
| 05/14           | 1899.00            | 19.53 | 1859.78                   | 4.58  | 1866.14           | 5.31  |
| 06/14           | 1874.29            | 26.54 | 1835.12                   | 24.31 | 1902.32           | 41.68 |
| 07/14           | 1850.98            | 48.33 | 1858.10                   | 45.71 | 1860.88           | 5.71  |
| 08/14           | –                  | –     | 1926.37                   | 13.18 | 1849.49           | 22.86 |
| 09/14           | 1906.50            | 18.85 | 1875.08                   | 15.76 | 1904.06           | 13.01 |
| 10/14           | –                  | –     | 1857.87                   | 24.53 | 1861.20           | 3.83  |
| 11/14           | 1918.22            | 21.45 | 1841.12                   | 4.72  | 1875.52           | 16.61 |
| 12/14           | –                  | –     | 1868.75                   | 4.01  | 1869.44           | 11.09 |
| 01/15           | 1926.10            | 18.97 | 1839.24                   | –     | 1866.90           | 10.58 |
| 02/15           | 1910.27            | 21.52 | –                         | –     | 1870.13           | 2.50  |
| 03/15           | 1921.68            | 16.11 | 1798.99                   | 38.85 | 1875.83           | 22.15 |
| 04/15           | 1913.80            | 19.40 | 1874.58                   | 13.98 | 1866.57           | 2.57  |
| 05/15           | 1873.06            | 22.73 | 1849.33                   | 5.85  | 1883.20           | –     |
| 06/15           | 1902.90            | 21.22 | 1864.78                   | 12.98 | 1886.12           | 42.02 |
| 07/15           | 1889.90            | 56.52 | 1889.69                   | 50.37 | 1832.81           | 6.76  |
| 08/15           | 1926.21            | 5.36  | 1937.76                   | 4.24  | 1865.06           | 6.70  |
| 09/15           | 1904.98            | 24.37 | 1878.28                   | 4.48  | 1907.63           | 16.36 |
| 10/15           | 1929.14            | 0.43  | 1906.05                   | 64.92 | 1868.59           | 12.19 |
| 11/15           | 1926.82            | 19.40 | 1880.53                   | 6.09  | 1866.72           | 6.65  |
| 12/15           | 1925.95            | 33.62 | 1865.46                   | –     | 1855.40           | 8.41  |
| 01/16           | 1930.00            | 17.00 | 1843.93                   | –     | 1911.30           | 25.71 |
| 02/16           | 1935.95            | 22.61 | 1868.06                   | –     | 1867.52           | 9.93  |
| 03/16           | 1931.31            | 15.79 | 1776.80                   | –     | 1889.40           | 6.19  |
| 04/16           | 1928.00            | 16.43 | 1885.82                   | –     | 1876.10           | 6.26  |
| 05/16           | 1924.12            | 10.01 | 1856.02                   | –     | 1872.29           | 8.06  |
| 06/16           | 1900.86            | 28.69 | 1885.82                   | –     | 1886.64           | 12.56 |
| 07/16           | 1839.39            | 24.46 | 1880.24                   | –     | 1862.84           | 13.98 |
| 08/16           | 1843.62            | 26.93 | 1908.36                   | –     | 1933.40           | 11.18 |
| 09/16           | –                  | –     | 1853.93                   | 17.71 | 1868.15           | 16.12 |
| 10/16           | 1922.31            | 21.85 | 1908.37                   | –     | 1885.88           | 4.68  |

|       |         |       |         |       |         |       |
|-------|---------|-------|---------|-------|---------|-------|
| 11/16 | 1959.41 | 51.48 | 1862.22 | -     | 1934.09 | 23.26 |
| 12/16 | 1951.06 | 13.23 | 1863.37 | -     | 1878.04 | 10.62 |
| 01/17 | 1960.30 | 28.82 | 1851.73 | -     | 1880.64 | 12.79 |
| 02/17 | 1944.06 | 7.95  | 1841.03 | -     | 1883.71 | 11.01 |
| 03/17 | 1940.94 | 11.44 | 1853.57 | -     | 1878.47 | 9.26  |
| 04/17 | 1953.93 | 31.33 | -       | -     | 1880.51 | 14.57 |
| 05/17 | 1942.01 | 15.67 | 1861.05 | 8.31  | 1877.19 | 14.99 |
| 06/17 | 1941.09 | 27.10 | -       | -     | 1903.56 | 31.69 |
| 07/17 | 1855.56 | 6.75  | 1907.71 | 15.57 | 1904.76 | 24.32 |
| 08/17 | 1867.59 | 29.46 | -       | -     | 1882.88 | 26.15 |
| 09/17 | 1877.14 | 53.44 | -       | -     | 1928.14 | 27.86 |
| 10/17 | 1925.01 | 12.08 | -       | -     | 1911.96 | 3.55  |
| 11/17 | 1937.78 | 10.75 | -       | -     | 1888.78 | 14.24 |
| 12/17 | 1950.89 | 13.06 | 1900.12 | 20.41 | 1871.62 | 4.97  |

20 **Table S2.** The monthly averaged (Avg.) values and the standard deviation (SD.) of the ship (TF5 + RYF) and aircraft (CONTRAIL, JMA) CH<sub>4</sub> retrievals for the latitude range 20–30° N, 2014–2018.

| <b>Date</b><br><b>(MM/YY)</b> | <b>Avg. Ship</b><br><b>(ppb)</b> | <b>SD</b> | <b>Avg.</b><br><b>CONTRAIL</b><br><b>(ppb)</b> | <b>SD</b> | <b>Avg.</b><br><b>JMA</b><br><b>(ppb)</b> | <b>SD</b> |
|-------------------------------|----------------------------------|-----------|------------------------------------------------|-----------|-------------------------------------------|-----------|
| 01/14                         | 1893.15                          | 21.67     | 1841.28                                        | 9.28      | 1833.83                                   | 2.39      |
| 02/14                         | 1893.30                          | 22.18     | 1828.02                                        | 9.25      | 1858.06                                   | 0.96      |
| 03/14                         | 1896.03                          | 23.46     | 1844.57                                        | 26.37     | 1849.20                                   | 4.61      |
| 04/14                         | 1883.92                          | 16.24     | 1828.67                                        | 8.57      | 1869.98                                   | 20.32     |
| 05/14                         | 1900.21                          | 17.08     | 1842.14                                        | 13.07     | 1826.60                                   | 6.37      |
| 06/14                         | 1837.59                          | 34.45     | 1841.72                                        | 7.56      | 1863.58                                   | 51.56     |
| 07/14                         | 1837.29                          | 32.87     | 1868.02                                        | 33.70     | 1902.80                                   | 8.05      |
| 08/14                         | 1812.08                          | 9.77      | 1855.44                                        | 40.23     | 1830.20                                   | 1.58      |
| 09/14                         | 1857.46                          | 38.10     | 1844.46                                        | 23.87     | 1904.73                                   | 24.40     |
| 10/14                         | –                                | –         | 1852.64                                        | 14.19     | 1865.34                                   | 2.23      |
| 11/14                         | 1888.57                          | 19.65     | 1853.68                                        | 15.58     | 1850.20                                   | 5.51      |
| 12/14                         | –                                | –         | 1853.77                                        | –         | 1845.23                                   | 4.82      |
| 01/15                         | 1901.44                          | 20.88     | 1851.36                                        | 12.93     | 1849.55                                   | 3.27      |
| 02/15                         | 1917.96                          | 21.89     | 1835.73                                        | 13.07     | 1895.75                                   | 17.80     |
| 03/15                         | 1895.19                          | 23.63     | 1837.05                                        | 25.12     | 1848.24                                   | 5.70      |
| 04/15                         | 1878.52                          | 22.32     | 1849.69                                        | 19.18     | 1860.86                                   | 7.22      |
| 05/15                         | 1851.58                          | 22.46     | 1843.46                                        | 11.08     | 1841.12                                   | 15.34     |
| 06/15                         | 1837.36                          | 18.91     | 1878.52                                        | 17.49     | 1849.03                                   | 3.17      |
| 07/15                         | 1825.78                          | 17.48     | 1839.87                                        | 16.10     | 1828.70                                   | 2.10      |
| 08/15                         | 1839.99                          | 29.41     | 1825.02                                        | 1.97      | 1854.80                                   | 8.71      |
| 09/15                         | 1859.26                          | 45.43     | 1863.35                                        | 34.34     | 1872.40                                   | 10.05     |
| 10/15                         | 1897.43                          | 20.83     | 1864.17                                        | 12.12     | 1848.84                                   | 7.63      |
| 11/15                         | 1886.31                          | 21.92     | 1875.91                                        | –         | 1871.02                                   | 1.77      |
| 12/15                         | 1905.29                          | 18.68     | 1858.57                                        | 2.39      | 1859.53                                   | 2.92      |
| 01/16                         | 1909.91                          | 35.70     | 1845.29                                        | 0.79      | 1903.75                                   | 4.70      |
| 02/16                         | 1912.64                          | 19.72     | 1855.57                                        | 13.03     | 1858.44                                   | 3.03      |
| 03/16                         | 1920.40                          | 11.06     | 1817.12                                        | 70.45     | 1881.64                                   | 7.64      |
| 04/16                         | 1890.51                          | 27.84     | 1859.17                                        | 25.93     | 1866.14                                   | 4.65      |
| 05/16                         | 1911.81                          | 14.92     | 1851.77                                        | 3.45      | 1924.06                                   | 15.16     |
| 06/16                         | 1872.66                          | 38.77     | 1891.73                                        | 4.94      | 1841.45                                   | 9.60      |
| 07/16                         | 1831.59                          | 5.24      | 1906.03                                        | 39.52     | 1902.86                                   | 34.28     |
| 08/16                         | 1881.88                          | 25.39     | 1862.25                                        | 2.94      | 1918.48                                   | 30.62     |
| 09/16                         | 1872.13                          | 5.52      | 1884.13                                        | –         | 1888.00                                   | 13.69     |
| 10/16                         | 1875.73                          | 11.36     | 1893.50                                        | 35.31     | 1875.85                                   | 6.63      |

|       |         |       |         |       |         |       |
|-------|---------|-------|---------|-------|---------|-------|
| 11/16 | 1901.35 | 23.17 | 1861.86 | 12.61 | 1899.60 | 7.96  |
| 12/16 | 1928.66 | 25.82 | 1887.30 | 36.95 | 1872.43 | 5.68  |
| 01/17 | 1935.61 | 12.85 | 1871.77 | 3.59  | 1907.70 | 6.39  |
| 02/17 | 1930.53 | 7.92  | 1848.15 | 5.00  | 1859.64 | 1.79  |
| 03/17 | 1934.90 | 15.90 | 1844.78 | 3.54  | 1859.85 | 9.17  |
| 04/17 | 1936.98 | 18.94 | –       | –     | 1870.40 | 9.28  |
| 05/17 | 1926.92 | 15.28 | 1851.62 | –     | 1866.12 | 3.67  |
| 06/17 | 1943.77 | 29.21 | –       | –     | 1869.80 | 19.98 |
| 07/17 | 1843.25 | 7.14  | 1928.17 | –     | 1863.17 | 7.83  |
| 08/17 | –       | –     | –       | –     | 1886.68 | 21.00 |
| 09/17 | 1877.55 | 35.54 | –       | –     | 1914.95 | 28.17 |
| 10/17 | 1874.77 | 4.67  | –       | –     | 1897.23 | 11.20 |
| 11/17 | 1922.47 | 17.92 | –       | –     | 1878.26 | 1.21  |
| 12/17 | 1924.05 | 24.69 | 1899.06 | 23.25 | –       | –     |

**Table S3.** The monthly averaged (Avg.) values and the standard deviation (SD.) of the satellite XCH<sub>4</sub> retrievals of GOSAT NIES, RemoTeC SRON (SRFP), RemoTeC HD (HD), and OCFP for the latitude range 30–40° N, 2014–2018

| Date<br>(MM/YY) | Avg.<br>NIES<br>(ppb) | SD.   | Avg.<br>SRFP<br>(ppb) | SD.   | Avg.<br>HD<br>(ppb) | SD    | Avg.<br>OCFP<br>(ppb) | SD    |
|-----------------|-----------------------|-------|-----------------------|-------|---------------------|-------|-----------------------|-------|
| 01/14           | –                     | –     | –                     | –     | –                   | –     | –                     | –     |
| 02/14           | –                     | –     | –                     | –     | –                   | –     | –                     | –     |
| 03/14           | –                     | –     | –                     | –     | –                   | –     | –                     | –     |
| 04/14           | 1795.67               | 12.05 | –                     | –     | 1816.75             | 7.47  | –                     | –     |
| 05/14           | 1828.14               | 16.82 | 1826.08               | 4.74  | 1818.21             | 11.39 | –                     | –     |
| 06/14           | 1827.69               | 14.33 | 1815.37               | –     | –                   | –     | –                     | –     |
| 07/14           | 1837.09               | 12.24 | 1825.65               | 17.27 | 1822.62             | 24.54 | –                     | –     |
| 08/14           | 1824.85               | 14.77 | 1801.77               | 6.52  | 1802.99             | 8.38  | 1794.47               | 10.18 |
| 09/14           | 1841.54               | 9.99  | –                     | –     | 1861.18             | –     | –                     | –     |
| 10/14           | 1876.86               | –     | –                     | –     | –                   | –     | –                     | –     |
| 11/14           | –                     | –     | –                     | –     | –                   | –     | –                     | –     |
| 12/14           | –                     | –     | –                     | –     | –                   | –     | –                     | –     |
| 01/15           | –                     | –     | –                     | –     | –                   | –     | –                     | –     |
| 02/15           | –                     | –     | –                     | –     | –                   | –     | –                     | –     |
| 03/15           | 1820.27               | 14.38 | –                     | –     | –                   | –     | –                     | –     |
| 04/15           | 1832.10               | 8.81  | 1819.89               | 5.45  | 1827.53             | 22.67 | –                     | –     |
| 05/15           | 1823.59               | 9.02  | 1812.95               | 8.98  | 1810.39             | 9.28  | 1822.15               | 4.19  |
| 06/15           | 1838.49               | 10.18 | 1824.62               | 12.11 | 1828.58             | 10.93 | 1834.49               | 0.44  |
| 07/15           | 1820.12               | 14.86 | 1806.64               | 14.36 | 1811.41             | 14.47 | 1796.04               | 3.17  |
| 08/15           | 1845.27               | 20.53 | 1820.65               | 13.31 | 1824.36             | 12.64 | 1832.99               | 17.30 |
| 09/15           | 1848.69               | 18.64 | –                     | –     | –                   | –     | –                     | –     |
| 10/15           | 1847.47               | 26.79 | –                     | –     | –                   | –     | –                     | –     |
| 11/15           | –                     | –     | –                     | –     | –                   | –     | –                     | –     |
| 12/15           | –                     | –     | –                     | –     | –                   | –     | –                     | –     |
| 01/16           | –                     | –     | –                     | –     | –                   | –     | –                     | –     |
| 02/16           | –                     | –     | –                     | –     | –                   | –     | –                     | –     |
| 03/16           | 1835.86               | 18.81 | –                     | –     | –                   | –     | –                     | –     |
| 04/16           | 1832.70               | 14.74 | 1827.79               | 8.63  | 1829.49             | –     | 1833.08               | –     |
| 05/16           | 1844.98               | 9.24  | 1819.92               | –     | 1830.21             | 12.12 | 1835.85               | –     |
| 06/16           | 1855.21               | 14.87 | 1841.44               | 13.74 | 1841.91             | 13.57 | 1835.67               | 11.55 |
| 07/16           | 1838.98               | 16.93 | 1830.20               | 19.00 | 1831.86             | 18.40 | 1828.61               | 13.96 |
| 08/16           | 1865.19               | 16.45 | 1821.14               | 12.06 | 1813.28             | 13.29 | 1862.16               | 29.80 |
| 09/16           | 1856.41               | 19.35 | –                     | –     | –                   | –     | 1842.02               | 13.52 |
| 10/16           | 1812.75               | 12.67 | –                     | –     | –                   | –     | –                     | –     |

|       |         |       |         |       |         |       |         |       |
|-------|---------|-------|---------|-------|---------|-------|---------|-------|
| 11/16 | -       | -     | -       | -     | -       | -     | -       | -     |
| 12/16 | -       | -     | -       | -     | -       | -     | -       | -     |
| 01/17 | -       | -     | -       | -     | -       | -     | -       | -     |
| 02/17 | -       | -     | -       | -     | -       | -     | -       | -     |
| 03/17 | 1855.55 | 16.09 | -       | -     | -       | -     | -       | -     |
| 04/17 | 1834.37 | 15.15 | -       | -     | -       | -     | -       | -     |
| 05/17 | 1852.79 | 12.30 | 1841.53 | 14.42 | 1839.96 | 13.84 | -       | -     |
| 06/17 | 1857.65 | 9.79  | 1850.53 | 11.41 | 1843.83 | 9.23  | 1846.35 | -     |
| 07/17 | 1858.32 | 10.34 | 1838.98 | 19.06 | 1844.67 | 15.79 | 1835.52 | 16.86 |
| 08/17 | 1870.59 | 18.03 | 1843.67 | 10.89 | 1851.83 | 28.80 | -       | -     |
| 09/17 | 1872.87 | 12.55 | -       | -     | -       | -     | -       | -     |
| 10/17 | 1850.52 | -     | -       | -     | -       | -     | -       | -     |
| 11/17 | -       | -     | -       | -     | -       | -     | -       | -     |
| 12/17 | -       | -     | -       | -     | -       | -     | -       | -     |

30 **Table S4.** The monthly averaged (Avg.) values and the standard deviation (SD.) of the satellite XCH<sub>4</sub> retrievals of GOSAT NIES, RemoTeC SRON (SRFP), RemoTeC HD (HD), and OCFP for the latitude range 20–30° N, 2014–2018.

| <b>Date</b><br><b>(MM/YY)</b> | <b>Avg.</b><br><b>NIES</b><br><b>(ppb)</b> | <b>SD.</b><br><b>–</b> | <b>Avg.</b><br><b>SRFP</b><br><b>(ppb)</b> | <b>SD.</b><br><b>–</b> | <b>Avg. HD</b><br><b>(ppb)</b> | <b>SD</b><br><b>–</b> | <b>Avg.</b><br><b>OCFP</b><br><b>(ppb)</b> | <b>SD</b><br><b>–</b> |
|-------------------------------|--------------------------------------------|------------------------|--------------------------------------------|------------------------|--------------------------------|-----------------------|--------------------------------------------|-----------------------|
| 01/14                         | –                                          | –                      | –                                          | –                      | –                              | –                     | –                                          | –                     |
| 02/14                         | –                                          | –                      | –                                          | –                      | –                              | –                     | –                                          | –                     |
| 03/14                         | 1817.46                                    | 7.80                   | 1809.18                                    | 8.33                   | 1809.19                        | 7.97                  | 1809.15                                    | 8.89                  |
| 04/14                         | 1829.92                                    | 11.14                  | 1817.08                                    | 10.04                  | 1817.08                        | 15.59                 | 1817.86                                    | 18.19                 |
| 05/14                         | 1825.44                                    | 19.38                  | 1812.61                                    | 13.35                  | 1814.16                        | 13.08                 | 1810.60                                    | 9.89                  |
| 06/14                         | 1835.82                                    | 10.03                  | 1812.58                                    | 18.09                  | 1806.02                        | 10.32                 | 1811.59                                    | 6.80                  |
| 07/14                         | 1818.37                                    | 5.78                   | 1804.32                                    | 11.28                  | 1808.71                        | 11.82                 | 1803.86                                    | 9.16                  |
| 08/14                         | 1841.25                                    | 19.60                  | 1804.49                                    | 13.24                  | 1805.52                        | 14.27                 | 1813.58                                    | 14.08                 |
| 09/14                         | 1842.17                                    | 16.73                  | 1820.74                                    | 7.03                   | 1820.56                        | 7.36                  | 1831.55                                    | 14.23                 |
| 10/14                         | 1850.94                                    | 16.37                  | –                                          | –                      | –                              | –                     | –                                          | –                     |
| 11/14                         | –                                          | –                      | –                                          | –                      | –                              | –                     | –                                          | –                     |
| 12/14                         | –                                          | –                      | –                                          | –                      | –                              | –                     | –                                          | –                     |
| 01/15                         | –                                          | –                      | –                                          | –                      | –                              | –                     | –                                          | –                     |
| 02/15                         | 1831.48                                    | 9.23                   | –                                          | –                      | –                              | –                     | –                                          | –                     |
| 03/15                         | 1826.02                                    | 8.84                   | 1826.81                                    | –                      | 1839.22                        | –                     | 1831.57                                    | 5.23                  |
| 04/15                         | 1827.31                                    | 9.79                   | 1815.39                                    | 11.64                  | 1818.62                        | 10.85                 | 1818.99                                    | 11.36                 |
| 05/15                         | 1834.13                                    | 11.24                  | 1819.57                                    | 8.89                   | 1824.01                        | 8.58                  | 1827.60                                    | 6.03                  |
| 06/15                         | 1826.88                                    | 7.63                   | 1818.66                                    | 10.76                  | 1820.27                        | 10.22                 | 1822.98                                    | 10.21                 |
| 07/15                         | 1822.39                                    | 12.19                  | 1810.29                                    | 12.85                  | 1812.64                        | 11.31                 | 1809.26                                    | 7.97                  |
| 08/15                         | 1835.73                                    | 12.71                  | 1821.64                                    | 13.86                  | 1823.25                        | 13.76                 | 1827.95                                    | 12.88                 |
| 09/15                         | 1863.28                                    | 18.27                  | 1830.51                                    | 10.87                  | 1830.34                        | 11.89                 | 1826.68                                    | 11.81                 |
| 10/15                         | 1846.77                                    | 12.87                  | –                                          | –                      | –                              | –                     | –                                          | –                     |
| 11/15                         | 1834.50                                    | 1.34                   | –                                          | –                      | –                              | –                     | –                                          | –                     |
| 12/15                         | –                                          | –                      | –                                          | –                      | –                              | –                     | –                                          | –                     |
| 01/16                         | 1823.47                                    | 4.54                   | –                                          | –                      | –                              | –                     | –                                          | –                     |
| 02/16                         | 1832.47                                    | 11.03                  | –                                          | –                      | –                              | –                     | –                                          | –                     |
| 03/16                         | 1843.07                                    | 11.37                  | 1843.36                                    | 2.57                   | 1847.07                        | 5.92                  | 1830.91                                    | 21.66                 |
| 04/16                         | 1837.44                                    | 8.84                   | 1825.51                                    | 7.54                   | 1830.38                        | 9.45                  | 1826.52                                    | 9.00                  |
| 05/16                         | 1845.65                                    | 9.10                   | 1832.41                                    | 10.45                  | 1835.04                        | 9.45                  | 1834.00                                    | 11.31                 |
| 06/16                         | 1837.26                                    | 17.88                  | 1825.15                                    | 13.53                  | 1825.05                        | 13.15                 | 1828.31                                    | 14.58                 |
| 07/16                         | 1846.93                                    | 19.23                  | 1826.44                                    | 15.92                  | 1824.13                        | 18.28                 | 1823.57                                    | 13.45                 |
| 08/16                         | 1856.33                                    | 3.74                   | 1836.82                                    | 17.57                  | 1841.47                        | 13.59                 | 1836.79                                    | 15.61                 |
| 09/16                         | 1864.27                                    | 19.19                  | 1845.49                                    | 21.50                  | 1843.82                        | 20.95                 | 1840.95                                    | 16.65                 |
| 10/16                         | 1848.80                                    | 11.24                  | –                                          | –                      | –                              | –                     | 1841.91                                    | 6.29                  |



|       |         |       |         |       |         |       |         |       |
|-------|---------|-------|---------|-------|---------|-------|---------|-------|
| 11/16 | -       | -     | -       | -     | -       | -     | -       | -     |
| 12/16 | -       | -     | -       | -     | -       | -     | -       | -     |
| 01/17 | -       | -     | -       | -     | -       | -     | -       | -     |
| 02/17 | 1837.78 | 11.31 | -       | -     | -       | -     | 1825.19 | 8.86  |
| 03/17 | 1844.20 | 8.21  | 1840.70 | 4.96  | 1841.53 | -     | 1836.38 | 9.22  |
| 04/17 | 1845.21 | 12.40 | 1830.99 | 10.56 | 1837.81 | 12.67 | 1827.20 | 12.22 |
| 05/17 | 1852.53 | 9.94  | 1839.13 | 7.57  | 1842.91 | 9.76  | 1843.44 | 11.44 |
| 06/17 | 1863.15 | 9.42  | 1834.59 | 11.76 | 1834.32 | 12.02 | 1843.99 | 9.32  |
| 07/17 | 1853.46 | 14.59 | 1829.48 | 12.88 | 1833.03 | 14.12 | 1835.08 | 7.87  |
| 08/17 | 1838.11 | 9.46  | 1841.46 | 13.29 | 1841.75 | 14.19 | 1841.14 | 10.32 |
| 09/17 | 1892.64 | 9.71  | 1848.14 | 18.14 | 1847.74 | 13.37 | 1855.02 | 8.78  |
| 10/17 | 1863.58 | 16.76 | -       | -     | -       | -     | 1845.42 | 13.35 |
| 11/17 | 1860.87 | -     | -       | -     | -       | -     | -       | -     |
| 12/17 | -       | -     | -       | -     | -       | -     | -       | -     |

**Table S5.** Monthly simple obs. XCH<sub>4</sub>, obs. XCH<sub>4</sub>, and blended obs. XCH<sub>4</sub> values and its uncertainty interval (UC) derived from uncertainties in the CH<sub>4</sub> profile construction (see text) for the latitude range 30–40° N, 2014–2018.

35

| <b>Date</b><br><b>(MM/YY)</b> | <b>simple</b><br><b>obs.</b><br><b>XCH<sub>4</sub></b><br><b>(ppb)</b> | <b>± UC.</b> | <b>obs.</b><br><b>XCH<sub>4</sub></b><br><b>(ppb)</b> | <b>± UC.</b> | <b>blended</b><br><b>obs.</b><br><b>XCH<sub>4</sub></b><br><b>(ppb)</b> | <b>± UC.</b> |
|-------------------------------|------------------------------------------------------------------------|--------------|-------------------------------------------------------|--------------|-------------------------------------------------------------------------|--------------|
| 01/14                         | –                                                                      | –            | –                                                     | –            | –                                                                       | –            |
| 02/14                         | –                                                                      | –            | –                                                     | –            | –                                                                       | –            |
| 03/14                         | –                                                                      | –            | –                                                     | –            | –                                                                       | –            |
| 04/14                         | –                                                                      | –            | –                                                     | –            | –                                                                       | –            |
| 05/14                         | 1825.15                                                                | 22           | 1826.07                                               | 20           | 1826.50                                                                 | 16           |
| 06/14                         | 1806.93                                                                | 22           | 1824.49                                               | 20           | 1826.78                                                                 | 16           |
| 07/14                         | 1814.80                                                                | 22           | 1815.78                                               | 20           | 1818.12                                                                 | 16           |
| 08/14                         | –                                                                      | –            | –                                                     | –            | –                                                                       | –            |
| 09/14                         | 1848.76                                                                | 22           | 1856.94                                               | 20           | 1854.83                                                                 | 16           |
| 10/14                         | –                                                                      | –            | –                                                     | –            | –                                                                       | –            |
| 11/14                         | –                                                                      | –            | –                                                     | –            | –                                                                       | –            |
| 12/14                         | –                                                                      | –            | –                                                     | –            | –                                                                       | –            |
| 01/15                         | –                                                                      | –            | –                                                     | –            | –                                                                       | –            |
| 02/15                         | –                                                                      | –            | –                                                     | –            | –                                                                       | –            |
| 03/15                         | 1808.91                                                                | 22           | 1831.08                                               | 20           | 1834.11                                                                 | 16           |
| 04/15                         | 1838.95                                                                | 22           | 1835.04                                               | 20           | 1834.69                                                                 | 16           |
| 05/15                         | 1814.14                                                                | 22           | 1822.93                                               | 20           | 1825.52                                                                 | 16           |
| 06/15                         | 1837.56                                                                | 22           | 1842.19                                               | 20           | 1844.20                                                                 | 16           |
| 07/15                         | 1846.93                                                                | 22           | 1829.02                                               | 20           | 1834.30                                                                 | 16           |
| 08/15                         | 1885.51                                                                | 22           | 1863.95                                               | 20           | 1862.25                                                                 | 16           |
| 09/15                         | 1852.71                                                                | 22           | 1861.14                                               | 20           | 1861.47                                                                 | 16           |
| 10/15                         | 1874.26                                                                | 22           | 1861.84                                               | 20           | 1859.33                                                                 | 16           |
| 11/15                         | –                                                                      | –            | –                                                     | –            | –                                                                       | –            |
| 12/15                         | –                                                                      | –            | –                                                     | –            | –                                                                       | –            |
| 01/16                         | –                                                                      | –            | –                                                     | –            | –                                                                       | –            |
| 02/16                         | –                                                                      | –            | –                                                     | –            | –                                                                       | –            |
| 03/16                         | –                                                                      | –            | –                                                     | –            | –                                                                       | –            |
| 04/16                         | 1845.42                                                                | 22           | 1841.91                                               | 20           | 1842.11                                                                 | 16           |
| 05/16                         | 1834.21                                                                | 22           | 1835.98                                               | 20           | 1841.43                                                                 | 16           |
| 06/16                         | 1845.55                                                                | 22           | 1845.35                                               | 20           | 1845.73                                                                 | 16           |
| 07/16                         | 1820.04                                                                | 22           | 1816.50                                               | 20           | 1823.08                                                                 | 16           |
| 08/16                         | 1837.15                                                                | 22           | 1846.36                                               | 20           | 1841.52                                                                 | 16           |
| 09/16                         | –                                                                      | –            | –                                                     | –            | –                                                                       | –            |
| 10/16                         | 1873.40                                                                | 22           | 1866.35                                               | 20           | 1862.97                                                                 | 16           |

|       |         |    |         |    |         |    |
|-------|---------|----|---------|----|---------|----|
| 11/16 | -       | -  | -       | -  | -       | -  |
| 12/16 | -       | -  | -       | -  | -       | -  |
| 01/17 | -       | -  | -       | -  | -       | -  |
| 02/17 | -       | -  | -       | -  | -       | -  |
| 03/17 | -       | -  | -       | -  | -       | -  |
| 04/17 | -       | -  | -       | -  | -       | -  |
| 05/17 | 1847.96 | 22 | 1848.65 | 20 | 1853.89 | 16 |
| 06/17 | -       | -  | -       | -  | -       | -  |
| 07/17 | 1841.61 | 22 | 1843.23 | 20 | 1841.29 | 16 |
| 08/17 | -       | -  | -       | -  | -       | -  |
| 09/17 | -       | -  | -       | -  | -       | -  |
| 10/17 | -       | -  | -       | -  | -       | -  |
| 11/17 | -       | -  | -       | -  | -       | -  |
| 12/17 | -       | -  | -       | -  | -       | -  |

**Table S6.** Monthly simple obs. XCH<sub>4</sub>, obs. XCH<sub>4</sub>, and blended obs. XCH<sub>4</sub> values and its uncertainty interval (UC) derived from uncertainties in the CH<sub>4</sub> profile construction (see text) for the latitude range 20–30° N, 2014–2018.

40

| <b>Date</b>    | <b>simple obs.</b>     | <b>± UC.</b> | <b>obs. XCH<sub>4</sub></b> | <b>± UC.</b> | <b>blended</b>         | <b>± UC.</b> |
|----------------|------------------------|--------------|-----------------------------|--------------|------------------------|--------------|
| <b>(MM/YY)</b> | <b>XCH<sub>4</sub></b> |              | <b>(ppb)</b>                |              | <b>obs.</b>            |              |
|                | <b>(ppb)</b>           |              |                             |              | <b>XCH<sub>4</sub></b> |              |
|                |                        |              |                             |              | <b>(ppb)</b>           |              |
| 01/14          | –                      | –            | –                           | –            | –                      | –            |
| 02/14          | –                      | –            | –                           | –            | –                      | –            |
| 03/14          | 1829.98                | 22           | 1830.01                     | 20           | 1829.39                | 16           |
| 04/14          | 1816.47                | 22           | 1828.14                     | 20           | 1828.98                | 16           |
| 05/14          | 1827.43                | 22           | 1821.09                     | 20           | 1826.34                | 16           |
| 06/14          | 1808.59                | 22           | 1815.33                     | 20           | 1817.90                | 16           |
| 07/14          | 1824.85                | 22           | 1836.38                     | 20           | 1832.13                | 16           |
| 08/14          | 1811.48                | 22           | 1803.85                     | 20           | 1806.89                | 16           |
| 09/14          | 1825.34                | 22           | 1844.00                     | 20           | 1843.74                | 16           |
| 10/14          | –                      | –            | –                           | –            | –                      | –            |
| 11/14          | –                      | –            | –                           | –            | –                      | –            |
| 12/14          | –                      | –            | –                           | –            | –                      | –            |
| 01/15          | –                      | –            | –                           | –            | –                      | –            |
| 02/15          | 1831.17                | 22           | 1847.24                     | 20           | 1845.52                | 16           |
| 03/15          | 1823.17                | 22           | 1826.51                     | 20           | 1828.45                | 16           |
| 04/15          | 1823.60                | 22           | 1826.49                     | 20           | 1828.17                | 16           |
| 05/15          | 1817.34                | 22           | 1816.46                     | 20           | 1820.77                | 16           |
| 06/15          | 1829.40                | 22           | 1818.95                     | 20           | 1823.88                | 16           |
| 07/15          | 1807.91                | 22           | 1804.58                     | 20           | 1814.63                | 16           |
| 08/15          | 1809.27                | 22           | 1817.79                     | 20           | 1822.31                | 16           |
| 09/15          | 1837.51                | 22           | 1840.38                     | 20           | 1840.41                | 16           |
| 10/15          | 1850.51                | 22           | 1846.02                     | 20           | 1849.15                | 16           |
| 11/15          | 1849.03                | 22           | 1847.28                     | 20           | 1847.32                | 16           |
| 12/15          | –                      | –            | –                           | –            | –                      | –            |
| 01/16          | 1842.59                | 22           | 1858.72                     | 20           | 1856.56                | 16           |
| 02/16          | 1841.86                | 22           | 1842.40                     | 20           | 1843.67                | 16           |
| 03/16          | 1826.58                | 22           | 1844.37                     | 20           | 1848.92                | 16           |
| 04/16          | 1838.26                | 22           | 1840.34                     | 20           | 1840.99                | 16           |
| 05/16          | 1840.80                | 22           | 1860.36                     | 20           | 1859.03                | 16           |
| 06/16          | 1848.15                | 22           | 1833.62                     | 20           | 1836.25                | 16           |
| 07/16          | 1840.88                | 22           | 1843.38                     | 20           | 1838.97                | 16           |
| 08/16          | 1842.80                | 22           | 1859.37                     | 20           | 1858.98                | 16           |
| 09/16          | 1854.35                | 22           | 1855.83                     | 20           | 1854.11                | 16           |
| 10/16          | 1861.93                | 22           | 1856.48                     | 20           | 1854.36                | 16           |

|       |         |    |         |    |         |    |
|-------|---------|----|---------|----|---------|----|
| 11/16 | -       | -  | -       | -  | -       | -  |
| 12/16 | -       | -  | -       | -  | -       | -  |
| 01/17 | -       | -  | -       | -  | -       | -  |
| 02/17 | 1837.04 | 22 | 1838.05 | 20 | 1840.96 | 16 |
| 03/17 | 1846.02 | 22 | 1853.25 | 20 | 1854.66 | 16 |
| 04/17 | -       | -  | -       | -  | -       | -  |
| 05/17 | 1850.93 | 22 | 1851.81 | 20 | 1857.28 | 16 |
| 06/17 | -       | -  | -       | -  | -       | -  |
| 07/17 | 1857.04 | 22 | 1840.32 | 20 | 1837.86 | 16 |
| 08/17 | -       | -  | -       | -  | -       | -  |
| 09/17 | -       | -  | -       | -  | -       | -  |
| 10/17 | -       | -  | -       | -  | -       | -  |
| 11/17 | -       | -  | -       | -  | -       | -  |
| 12/17 | -       | -  | -       | -  | -       | -  |

**Table S7.** The monthly averaged (Avg.) values and the standard deviation (SD.) of the TCCON XCH<sub>4</sub> retrievals at Tsukuba and Saga for 2014–2018.

| <b>Date<br/>(MM/YY)</b> | <b>Tsukuba<br/>(ppb)</b> | <b>SD</b> | <b>Saga<br/>(ppb)</b> | <b>SD</b> |
|-------------------------|--------------------------|-----------|-----------------------|-----------|
| 01/14                   | –                        | –         | 1824.86               | 5.75      |
| 02/14                   | –                        | –         | 1816.11               | 4.26      |
| 03/14                   | 1824.15                  | 2.21      | 1822.38               | 7.43      |
| 04/14                   | 1819.55                  | 6.31      | 1827.52               | 8.18      |
| 05/14                   | 1824.08                  | 11.13     | 1828.19               | 7.87      |
| 06/14                   | 1829.55                  | 8.64      | 1824.12               | 8.76      |
| 07/14                   | 1837.03                  | 11.83     | 1836.38               | 13.72     |
| 08/14                   | 1814.43                  | 12.74     | 1854.64               | 2.57      |
| 09/14                   | 1853.40                  | 16.29     | 1858.81               | 15.83     |
| 10/14                   | 1842.46                  | 13.94     | 1839.39               | 6.24      |
| 11/14                   | 1836.07                  | 5.69      | 1838.19               | 4.19      |
| 12/14                   | 1829.57                  | 7.16      | 1836.17               | 2.58      |
| 01/15                   | 1826.45                  | 8.06      | 1836.71               | 6.54      |
| 02/15                   | 1820.07                  | 12.45     | 1830.81               | 7.62      |
| 03/15                   | 1820.61                  | 9.17      | –                     | –         |
| 04/15                   | 1831.67                  | 7.60      | –                     | –         |
| 05/15                   | 1824.81                  | 11.01     | 1836.68               | 5.28      |
| 06/15                   | 1829.95                  | 8.61      | 1841.32               | 8.86      |
| 07/15                   | 1823.38                  | 20.59     | 1819.40               | 5.52      |
| 08/15                   | 1836.00                  | 15.25     | 1832.05               | 23.41     |
| 09/15                   | 1840.77                  | 6.29      | 1858.52               | 8.19      |
| 10/15                   | 1843.76                  | 10.63     | 1850.49               | 8.65      |
| 11/15                   | 1843.44                  | 7.27      | 1846.77               | 3.13      |
| 12/15                   | 1842.35                  | 7.35      | 1848.10               | 4.97      |
| 01/16                   | 1840.86                  | 7.03      | 1849.40               | 5.86      |
| 02/16                   | 1832.64                  | 8.43      | 1838.30               | 6.71      |
| 03/16                   | 1829.60                  | 8.23      | 1839.86               | 9.93      |
| 04/16                   | 1833.25                  | 6.83      | 1842.61               | 5.70      |
| 05/16                   | 1832.81                  | 5.54      | 1840.62               | 6.94      |
| 06/16                   | 1837.37                  | 12.72     | 1851.85               | 4.19      |
| 07/16                   | 1849.53                  | 16.17     | –                     | –         |
| 08/16                   | 1854.21                  | 10.61     | 1855.97               | 20.68     |
| 09/16                   | 1874.13                  | 14.61     | 1871.28               | 12.72     |
| 10/16                   | 1853.78                  | 8.59      | 1872.63               | 16.64     |
| 11/16                   | 1853.15                  | 5.14      | 1857.59               | 6.08      |

|       |         |       |         |       |
|-------|---------|-------|---------|-------|
| 12/16 | 1850.72 | 5.18  | 1857.51 | 6.05  |
| 01/17 | 1844.24 | 6.71  | 1848.66 | 6.72  |
| 02/17 | 1840.49 | 4.52  | 1847.39 | 6.30  |
| 03/17 | –       | –     | 1845.50 | 7.41  |
| 04/17 | –       | –     | 1847.49 | 10.74 |
| 05/17 | –       | –     | 1851.50 | 8.95  |
| 06/17 | –       | –     | 1857.40 | 9.81  |
| 07/17 | 1847.97 | 10.73 | 1852.60 | 28.26 |
| 08/17 | 1869.46 | 12.11 | 1873.05 | 16.45 |
| 09/17 | 1862.91 | 5.32  | 1882.44 | 10.03 |
| 10/17 | 1858.60 | 4.09  | 1867.94 | 6.98  |
| 11/17 | 1857.70 | 8.62  | 1867.25 | 6.02  |
| 12/17 | 1856.46 | 7.06  | 1866.53 | 5.39  |
